# Supplementary material
Source: PubMed Central journal article supplement (PMC6904857)
Supplement: mmc1.pdf [file mmc1.pdf]

## Whole Genome Sequencing Identifies *CRISPLD2* as a Lung Function Gene in Children With Asthma

*Priyadarshini Kachroo, PhD; Julian Hecker, PhD; Bo L. Chawes, MD; Tarunveer S. Ahluwalia, PhD; Michael H. Cho, MD; Dandi Qiao, PhD; Rachel S. Kelly, PhD; Su H. Chu, PhD; Yamini V. Virkud, MD; Mengna Huang, PhD; Kathleen C. Barnes, PhD; Esteban G. Burchard, MD; Celeste Eng, PhD; Donglei Hu, PhD; Juan C. Celedón, MD; Michelle Daya, PhD; Albert M. Levin, PhD; Hongsheng Gui, PhD; L. Keoki Williams, MD; Erick Forno, MD; Angel C.Y. Mak, PhD; Lydiana Avila, MD; Manuel E. Soto-Quiros, MD; Michelle M. Cloutier, MD; Edna Acosta-Pérez, PhD; Glorisa Canino, PhD; Klaus Bønnelykke, MD; Hans Bisgaard, MD; Benjamin A. Raby, MD; Christoph Lange, PhD; Scott T. Weiss, MD; and Jessica A. Lasky-Su, ScD; for the National Heart, Lung, and Blood Institute Trans-Omics for Precision Medicine (TOPMed) Consortium*

CHEST 2019; 156(6):1068-1079

*Online supplements are not copyedited prior to posting and the author(s) take full responsibility for the accuracy of all data.*

© 2019 AMERICAN COLLEGE OF CHEST PHYSICIANS. Reproduction of this article is prohibited without written permission from the American College of Chest Physicians. See online for more details. DOI: 10.1016/j.chest.2019.08.2202

## **e-Appendix 1.**

### **Supplemental Methods**

#### ***Asthma ascertainment criteria in CRA***

The methacholine challenge test was performed on a separate visit in children with an FEV<sub>1</sub> of at least 65% of predicted<sup>1</sup>. The inhalation protocol consisted of five breaths of saline solution followed by one breath of a 1 mg/mL methacholine solution, one and four breaths of a 5 mg/mL methacholine solution, and one breath of a 25 mg/mL methacholine solution provided with a DeVilbiss 646 nebulizer (Sunrise Medical; Carlsbad, CA, US). Bronchial responsiveness was calculated as the provocative dose of methacholine resulting in a 20% drop in FEV<sub>1</sub> from baseline (PD<sub>20</sub>). A strict definition of asthma affection status was defined requiring the presence of methacholine dose responsiveness ( $\leq 8.58 \mu\text{M}$ ). At enrollment, a blood sample was drawn from the participating children and both their parents (i.e. trios) and the children's lung function was investigated by means of spirometry before and after administration of a bronchodilator.

#### ***Baseline Lung Function***

Baseline lung function was measured by spirometry using a Survey Tach Spirometer (Warren E. Collins; Braintree, MA, US) with the children seated and wearing a nose clip. Prior to assessment, the children were told to withhold short-acting bronchodilators for at least 4 hours. The best forced expiratory volume in the 1<sup>st</sup> second (FEV<sub>1</sub>) and corresponding forced vital capacity (FVC) values from 3-5 acceptable flow-volume curves were selected for analysis of FEV<sub>1</sub> and FEV<sub>1</sub>/FVC ratio according to the American Thoracic Society guidelines<sup>2</sup>. The measurements were calibrated for gender, age and height according to reference values for Mexican Americans<sup>3</sup>.

#### ***Bronchodilator Response***

After completing baseline spirometry, the children were given 200  $\mu\text{g}$  (2 puffs) of an albuterol pressurized metered-dose inhaler (pMDI) using a spacer device. Spirometry was repeated after 15 min, capturing post-bronchodilator FEV<sub>1</sub> and FEV<sub>1</sub>/FVC ratio as described above.

#### ***Replication Study Populations***

We identified six validation cohorts including children with ascertained asthma diagnosis primarily from the NHLBI Trans-Omics for Precision Medicine (TOPMed) consortium (CAMP<sup>4</sup>: Childhood Asthma Management Program, HPR: Hartford-Puerto Rico<sup>5</sup>, GALAI<sup>6</sup>: Gene-Environments and Admixture in Latino Americans, SAGE<sup>6</sup>: Study of African Americans, Asthma, Genes and the Environment, SAPPHIRE<sup>7</sup>: Study of Asthma Phenotypes and Pharmacogenomic Interactions by Race-ethnicity) and the Copenhagen Prospective Study on Asthma in Childhood<sup>8,9</sup> (COPSAC) cohort. Among these, three cohorts utilized similar criteria for asthma

classification as GACRS; namely AHR (CAMP<sub>4</sub>, Hartford-PR<sub>5</sub>, COPSAC<sub>8</sub>: case-status was strongly associated with AHR) and three did not include AHR in their classification (GALAI<sub>6</sub>, SAGE<sub>6</sub>, SAPPHIRE<sub>7</sub>). We provide a brief summary of each cohort here.

*Replication cohorts ascertained utilizing asthma diagnosis with confirmed AHR*

**HPR** (Hartford-Puerto Rico)

Brief Cohort description: The details of subject recruitment and study methods have been published previously<sup>10,11</sup>. In brief, from September 2003 to July 2008, 449 Puerto Rican children of age 6-14 years were recruited from elementary/middle schools in Hartford, Connecticut; and from March 2009 to June 2010, 678 Puerto Rican children living in San Juan, Puerto Rico, were recruited using a multistage probability sample design. Written parental consent was obtained for participating children, from whom written assent was also obtained. The study was approved by the Institutional Review Boards of Connecticut Children's Medical Center (Hartford, CT), the University of Puerto Rico (San Juan, PR), Brigham and Women's Hospital (Boston, MA), and the University of Pittsburgh (Pittsburgh, PA).

Asthma ascertainment/diagnosis criteria: Asthma was defined as physician diagnosis and at least one episode of wheeze in the prior year; controls were defined as no physician diagnosis and no wheeze in the prior year. Spirometry was conducted according to American Thoracic Society criteria<sup>2,12</sup>; spirometry was repeated 15 minutes after administration of 200 µg of albuterol via metered-dose inhaler. Bronchodilator response and airway responsiveness to methacholine was measured but was not the inclusion criteria. Of the 1,127 study participants, 943 had genome-wide genotypic data. Of these 943 children, 884 also had pre-bronchodilator measures of lung function, and 819 also had post-bronchodilator measures of lung function, Of those, 490 cases were included for the current analyses. Of the HPR cases who did undergo methacholine challenge testing, majority of them had airway hyperresponsiveness (AHR). All multivariable models of lung function were adjusted for age, sex, height, study site (Hartford vs. Puerto Rico) and principal components.

**CAMP** (Childhood Asthma Management Program)

Brief cohort description: CAMP is a multi-center randomized clinical trial that recruited children 5-12 years of age (n=1,041) with mild to moderate asthma and airway hyperresponsiveness (AHR) to determine the long-term (approximately 16.5 years of follow-up) effects of three inhaled treatments (placebo, nedocromil, or budesonide).

Asthma ascertainment/diagnosis criteria: Chronic asthma was determined by one or more of the following, for at least 6 months in the year prior to interview: asthma symptoms at least two times per week, at least two usages per week of an inhaled bronchodilator and daily asthma medication.

*Online supplements are not copyedited prior to posting and the author(s) take full responsibility for the accuracy of all data.*

Participants were also required to complete a screening period (28 days) providing evidence of mild to moderate asthma. Clinics determined airway responsiveness by the decrease in FEV1 after increasing concentrations of methacholine challenge using the Wright nebulizer–tidal breathing technique.

*Replication cohorts ascertained utilizing a doctor’s diagnosis of asthma*

**GALA II** (Gene-Environments and Admixture in Latino Americans)

Brief cohort description: The GALA II study includes 4,436 Latino asthma cases and controls recruited from community clinics and hospitals from New York, Chicago, San Francisco, Houston, and Puerto Rico (2,275 cases, 2,161 controls). Atopy was not an inclusion criteria for the study.

Asthma ascertainment/diagnosis criteria: Asthma was defined as having a history of physician-diagnosed asthma and two or more asthma symptoms (wheezing, coughing, and/or shortness of breath) in the preceding two years.

**SAGE** (Study of African Americans, Asthma, Genes and the Environment)

Brief cohort description: The SAGE study includes 1,989 African American asthma cases and controls recruited from clinics in the San Francisco Bay Area (1176 cases, 813 controls). Asthma was defined as having a history of physician-diagnosed asthma and two or more asthma symptoms (wheezing, coughing, and/or shortness of breath) in the preceding two years. Atopy was not an inclusion criteria for the study.

Asthma ascertainment/diagnosis criteria: Asthma was defined as having a history of physician-diagnosed asthma and two or more asthma symptoms (wheezing, coughing, and/or shortness of breath) in the preceding two years. Atopy was not an inclusion criteria for the study.

**SAPPHIRE** (Study of Asthma Phenotypes and Pharmacogenomic Interactions by Race-ethnicity)

Brief cohort description: The SAPPHIRE cohort is an ongoing study to identify the genetic predictors of asthma controller medication response among a population-based sample of individuals with asthma. Specifically, the cohort includes members of a large health system, which serves southeast Michigan and the greater Detroit metropolitan area.

Asthma ascertainment/diagnosis criteria: There were a total of 802 asthmatics included in this analysis. Potential participants were identified from health care claims and recorded diagnoses. Eligibility criteria for SAPPHIRE participants were as follows: age 12 to 56 years, a physician’s diagnosis of asthma, and no prior diagnosis of chronic obstructive pulmonary disease or congestive heart failure. Individuals who consented to participate also had a detailed research evaluation, which included assessing lung function, completing a study survey, and measuring

*Online supplements are not copyedited prior to posting and the author(s) take full responsibility for the accuracy of all data.*

bronchodilator response. Of the 802 SAPPHERE individuals included in the current study, 585 had childhood onset (reported age of diagnosis <18 years); 216 had adult onset asthma (reported age of diagnosis  $\geq$ 18 years); and one individual was missing information on age of onset.

### **COPSAC2000** (Copenhagen Prospective Study on Asthma in Childhood)

Brief cohort description: High-risk prospective birth cohort of 411 children born during 1998-2001 to mothers with doctor-diagnosed asthma in greater Copenhagen, Denmark. The cohort was enrolled at age 1 month and attended the research clinic for clinical examinations at ages 1 and 6 month and half-yearly hereafter till age 7. Acute care visits were arranged upon onset of any respiratory symptoms and symptom burden between visits were captured in a day-to-day diary fulfilled from birth onwards.

Asthma ascertainment/diagnosis criteria: A 3-month trial of inhaled corticosteroids (ICS) was prescribed to children suffering: 1) at least 5 dairy-verified episodes of troublesome lung symptoms within 6 months, each lasting at least 3 consecutive, 2) 4 weeks of consecutive troublesome lung symptoms, or 3) acute severe symptoms requiring a course of oral corticosteroids and/or admission to a pediatric ED. Asthma was diagnosed solely by the COPSAC pediatricians in children responding to such 3-months ICS trial and relapsing after stopping treatment. Current asthma by age 6 was diagnosed in children fulfilling the above diagnostic criteria and still depending on ICS in their 6<sup>th</sup> year of life. Asthma diagnosis was strongly associated with AHR to metacholine measured from age 1 month and onwards<sup>9</sup>.

### ***Sequencing and quality control***

Briefly, we submitted samples to the University of Washington, Northwest Genome Center for 30x average coverage PCR-free WGS. Reads were aligned to GRCh37 at the Informatics Resource Center (IRC), and variants were jointly called using the GotCloud vt pipeline, using a support vector machine to filter variants; additional filters for Mendelian errors and heterozygosity were also applied. Subject level QC on data released by the IRC included coverage, duplication, DNA fingerprints concordance, sample homo and heterozygosity, and contamination.

We performed additional QC on samples and variants passing IRC. To identify subject outliers, we examined transition to transversion ratio, heterozygous to homozygous genotype ratio, proportion of variants in dbSNP, call rate, inbreeding coefficient, Mendelian errors and gender errors. Relatedness was confirmed using the software KING<sup>13</sup> and population outliers were identified using TRACE. Genotypes with depth less

than 10 were excluded. Additional filtering on the variants was based on the concordance rate, mean depth, Mendelian errors, and call rate. INDELS and multiallelic variants were excluded in this analysis.

**e-Table 1.** The table shows all SNPs with association p-value below  $10^{-5}$  for baseline FEV1/FVC (unadjusted) and the corresponding p-values for the adjusted trait.

| rs ID      | Chr | Basepair  | A1 | A2 | MAF   | NINFF | Z-score | unadjusted model p-value | adjusted model p-value |
|------------|-----|-----------|----|----|-------|-------|---------|--------------------------|------------------------|
| rs12624042 | 2   | 1722883   | G  | A  | 0.131 | 122   | -4.547  | 5.45E-06                 | 2.72E-07               |
| rs697210   | 12  | 104092996 | C  | T  | 0.399 | 214   | -4.703  | 2.56E-06                 | 1.30E-05               |
| rs6564961  | 16  | 82079091  | G  | A  | 0.351 | 200   | -4.661  | 3.15E-06                 | 6.28E-06               |
| rs8061420  | 16  | 82082010  | C  | T  | 0.35  | 208   | -4.605  | 4.12E-06                 | 2.40E-05               |
| rs2966245  | 16  | 82106299  | G  | A  | 0.357 | 214   | -4.782  | 1.74E-06                 | 3.95E-06               |
| rs2911422  | 16  | 82109474  | C  | G  | 0.394 | 210   | -4.771  | 1.83E-06                 | 7.64E-06               |
| rs12931881 | 16  | 84879286  | A  | G  | 0.338 | 204   | -5.031  | 4.88E-07                 | 2.30E-05               |
| rs12051168 | 16  | 84879324  | C  | T  | 0.392 | 210   | -5.511  | 3.56E-08                 | 5.61E-06               |
| rs12051468 | 16  | 84879464  | G  | A  | 0.375 | 209   | -4.776  | 1.78E-06                 | 3.90E-05               |
| rs12932773 | 16  | 84879920  | A  | G  | 0.354 | 206   | -4.414  | 1.00E-05                 | 1.62E-04               |
| rs12919905 | 16  | 84880424  | A  | T  | 0.359 | 202   | -5.44   | 5.34E-08                 | 4.49E-06               |
| rs11649180 | 16  | 85430844  | C  | T  | 0.257 | 183   | -5.044  | 4.56E-07                 | 2.41E-07               |

\*Adjusted for gender, age and height. MAF: Minor Allele Frequency, NINFF: Number of informative families

**e-Table 2.** The table shows all SNPs with association p-value below  $10^{-5}$  for PB FEV1/FVC (unadjusted) and the corresponding p-values for the adjusted trait.

| rs ID      | Chr | Basepair | A1 | A2 | MAF   | NINFF | Z-score | unadjusted model p-value | adjusted model p-value |
|------------|-----|----------|----|----|-------|-------|---------|--------------------------|------------------------|
| rs34281851 | 7   | 41553437 | T  | C  | 0.055 | 63    | 4.434   | 9.24E-06                 | 1.30E-05               |
| rs1410832  | 9   | 32741593 | C  | T  | 0.226 | 168   | -4.459  | 8.24E-06                 | 5.70E-05               |
| rs1410833  | 9   | 32741649 | G  | C  | 0.226 | 168   | -4.459  | 8.24E-06                 | 5.70E-05               |
| rs4888884  | 16  | 78979488 | T  | G  | 0.385 | 212   | 4.65    | 3.31E-06                 | 6.20E-05               |
| rs2966245  | 16  | 82106299 | G  | A  | 0.357 | 213   | -4.438  | 9.10E-06                 | 1.50E-05               |
| rs11649180 | 16  | 85430844 | C  | T  | 0.257 | 183   | -4.448  | 8.66E-06                 | 9.17E-06               |
| rs8079846  | 17  | 21367904 | C  | T  | 0.474 | 219   | 4.442   | 8.92E-06                 | 1.60E-05               |
| rs2203841  | 17  | 21378625 | A  | G  | 0.458 | 218   | 4.546   | 5.46E-06                 | 1.30E-05               |

\*Adjusted for gender, age and height. MAF: Minor Allele Frequency, NINFF: Number of informative families

**e-Table 3.** The table shows all SNPs with association p-value below  $10^{-5}$  for baseline FEV1 (unadjusted) and the corresponding p-values for the adjusted trait.

| rs ID       | Chr | Basepair  | A1 | A2 | MAF   | NINFF | Z-score | unadjusted model p-value | adjusted model p-value |
|-------------|-----|-----------|----|----|-------|-------|---------|--------------------------|------------------------|
| rs72775502  | 1   | 245316755 | A  | C  | 0.379 | 197   | -4.775  | 1.80E-06                 | 7.29E-01               |
| rs9628692   | 1   | 245720262 | A  | C  | 0.362 | 209   | 4.601   | 4.21E-06                 | 1.07E-01               |
| rs77896577  | 1   | 245744896 | A  | G  | 0.157 | 141   | 4.496   | 6.94E-06                 | 5.37E-02               |
| rs4393798   | 2   | 43370728  | A  | G  | 0.082 | 81    | -4.408  | 1.00E-05                 | 6.29E-02               |
| rs1978647   | 2   | 43371360  | C  | G  | 0.078 | 77    | -4.559  | 5.13E-06                 | 7.93E-02               |
| rs138044470 | 3   | 112165660 | C  | A  | 0.03  | 40    | 4.524   | 6.06E-06                 | 2.55E-01               |
| rs6439251   | 3   | 130333768 | G  | A  | 0.458 | 215   | 4.519   | 6.21E-06                 | 1.17E-01               |
| rs7740935   | 6   | 163559154 | A  | T  | 0.143 | 125   | -4.588  | 4.47E-06                 | 6.39E-02               |
| rs1033578   | 6   | 163559644 | C  | T  | 0.138 | 125   | -4.475  | 7.65E-06                 | 6.68E-02               |
| rs1033579   | 6   | 163559907 | C  | T  | 0.138 | 125   | -4.475  | 7.65E-06                 | 6.68E-02               |
| rs6908473   | 6   | 163560002 | A  | T  | 0.138 | 125   | -4.475  | 7.65E-06                 | 6.68E-02               |
| rs6924563   | 6   | 163560038 | T  | C  | 0.137 | 124   | -4.773  | 1.81E-06                 | 4.97E-02               |
| rs58304775  | 6   | 163560095 | A  | G  | 0.139 | 126   | -4.415  | 1.00E-05                 | 6.88E-02               |
| rs57010913  | 6   | 163560097 | G  | A  | 0.139 | 126   | -4.415  | 1.00E-05                 | 6.88E-02               |
| rs57444816  | 6   | 163560158 | A  | G  | 0.139 | 126   | -4.415  | 1.00E-05                 | 6.88E-02               |
| rs6909176   | 6   | 163582608 | T  | C  | 0.119 | 111   | -4.523  | 6.09E-06                 | 2.59E-02               |
| rs12539002  | 7   | 52577868  | A  | G  | 0.413 | 214   | 4.642   | 3.44E-06                 | 6.02E-03               |
| rs10081348  | 7   | 156375728 | T  | C  | 0.049 | 56    | 4.471   | 7.79E-06                 | 5.32E-01               |
| rs62517707  | 8   | 131408202 | A  | G  | 0.238 | 178   | 4.492   | 7.07E-06                 | 7.04E-02               |
| rs2102861   | 8   | 134519616 | C  | A  | 0.438 | 213   | 4.427   | 9.54E-06                 | 1.49E-01               |
| rs9644992   | 9   | 90027030  | A  | G  | 0.066 | 73    | 4.673   | 2.96E-06                 | 5.69E-02               |
| rs72761264  | 9   | 133072737 | A  | G  | 0.132 | 109   | -4.524  | 6.06E-06                 | 2.85E-03               |
| rs11201438  | 10  | 86942568  | A  | G  | 0.257 | 177   | 4.58    | 4.65E-06                 | 2.65E-02               |
| rs1339907   | 10  | 86950656  | T  | C  | 0.262 | 179   | 4.704   | 2.56E-06                 | 1.27E-02               |
| rs1339908   | 10  | 86950658  | T  | C  | 0.262 | 179   | 4.704   | 2.56E-06                 | 1.27E-02               |
| rs17370747  | 10  | 86954878  | G  | A  | 0.239 | 177   | 4.523   | 6.10E-06                 | 6.81E-03               |
| rs11201447  | 10  | 86955624  | T  | C  | 0.295 | 193   | 4.415   | 1.00E-05                 | 5.74E-02               |
| rs2050795   | 10  | 86957751  | C  | T  | 0.295 | 193   | 4.415   | 1.00E-05                 | 5.74E-02               |
| rs7094082   | 10  | 86958017  | A  | G  | 0.265 | 186   | 4.414   | 1.00E-05                 | 7.33E-02               |
| rs1339914   | 10  | 86960054  | A  | T  | 0.268 | 185   | 4.461   | 8.17E-06                 | 5.96E-02               |
| rs1339915   | 10  | 86960078  | T  | C  | 0.268 | 185   | 4.461   | 8.17E-06                 | 5.96E-02               |
| rs12766774  | 10  | 86960524  | G  | A  | 0.268 | 185   | 4.461   | 8.17E-06                 | 5.96E-02               |
| rs12766218  | 10  | 86960634  | T  | C  | 0.268 | 185   | 4.461   | 8.17E-06                 | 5.96E-02               |
| rs11201452  | 10  | 86961299  | A  | T  | 0.268 | 185   | 4.461   | 8.17E-06                 | 5.96E-02               |
| rs12768920  | 10  | 86962827  | G  | A  | 0.268 | 185   | 4.461   | 8.17E-06                 | 5.96E-02               |
| rs11201453  | 10  | 86963611  | C  | T  | 0.268 | 185   | 4.461   | 8.17E-06                 | 5.96E-02               |
| rs1416924   | 10  | 86964119  | C  | T  | 0.268 | 185   | 4.461   | 8.17E-06                 | 5.96E-02               |
| rs12777141  | 10  | 86964444  | G  | A  | 0.268 | 185   | 4.461   | 8.17E-06                 | 5.96E-02               |
| rs12782135  | 10  | 86964500  | G  | A  | 0.319 | 204   | 4.423   | 9.73E-06                 | 4.70E-02               |
| rs11201454  | 10  | 86964566  | C  | A  | 0.268 | 185   | 4.461   | 8.17E-06                 | 5.96E-02               |
| rs11201455  | 10  | 86964789  | T  | C  | 0.268 | 185   | 4.461   | 8.17E-06                 | 5.96E-02               |
| rs1416925   | 10  | 86964927  | C  | T  | 0.268 | 185   | 4.461   | 8.17E-06                 | 5.96E-02               |
| rs1416926   | 10  | 86965064  | A  | T  | 0.268 | 185   | 4.461   | 8.17E-06                 | 5.96E-02               |
| rs1416927   | 10  | 86965204  | G  | A  | 0.268 | 185   | 4.461   | 8.17E-06                 | 5.96E-02               |
| rs1416929   | 10  | 86965265  | A  | G  | 0.268 | 185   | 4.461   | 8.17E-06                 | 5.96E-02               |
| rs11201456  | 10  | 86965535  | G  | A  | 0.268 | 185   | 4.461   | 8.17E-06                 | 5.96E-02               |
| rs11201457  | 10  | 86965572  | G  | C  | 0.268 | 185   | 4.461   | 8.17E-06                 | 5.96E-02               |



|             |    |          |   |   |       |     |       |          |          |
|-------------|----|----------|---|---|-------|-----|-------|----------|----------|
| rs11201459  | 10 | 86966069 | C | T | 0.26  | 179 | 4.599 | 4.25E-06 | 3.54E-02 |
| rs11201461  | 10 | 86966202 | G | A | 0.26  | 179 | 4.599 | 4.25E-06 | 3.54E-02 |
| rs11201462  | 10 | 86966316 | C | A | 0.26  | 179 | 4.599 | 4.25E-06 | 3.54E-02 |
| rs11201463  | 10 | 86966361 | G | T | 0.26  | 179 | 4.599 | 4.25E-06 | 3.54E-02 |
| rs11201464  | 10 | 86966369 | A | G | 0.26  | 179 | 4.599 | 4.25E-06 | 3.54E-02 |
| rs11201465  | 10 | 86966491 | C | T | 0.26  | 179 | 4.599 | 4.25E-06 | 3.54E-02 |
| rs11201466  | 10 | 86966577 | T | A | 0.26  | 179 | 4.599 | 4.25E-06 | 3.54E-02 |
| rs11201467  | 10 | 86966590 | G | A | 0.26  | 179 | 4.599 | 4.25E-06 | 3.54E-02 |
| rs11201468  | 10 | 86966732 | T | C | 0.26  | 179 | 4.599 | 4.25E-06 | 3.54E-02 |
| rs11201469  | 10 | 86966777 | T | C | 0.263 | 180 | 4.572 | 4.82E-06 | 4.07E-02 |
| rs11201470  | 10 | 86966910 | C | T | 0.26  | 179 | 4.599 | 4.25E-06 | 3.54E-02 |
| rs11201472  | 10 | 86967515 | G | A | 0.263 | 180 | 4.56  | 5.12E-06 | 4.24E-02 |
| rs11201474  | 10 | 86967642 | C | T | 0.26  | 179 | 4.599 | 4.25E-06 | 3.54E-02 |
| rs11201475  | 10 | 86967680 | T | G | 0.26  | 179 | 4.599 | 4.25E-06 | 3.54E-02 |
| rs11201477  | 10 | 86968052 | G | T | 0.26  | 179 | 4.599 | 4.25E-06 | 3.54E-02 |
| rs11201478  | 10 | 86968139 | A | T | 0.26  | 179 | 4.599 | 4.25E-06 | 3.54E-02 |
| rs11201479  | 10 | 86968244 | T | A | 0.26  | 179 | 4.599 | 4.25E-06 | 3.54E-02 |
| rs12355989  | 10 | 86968359 | C | T | 0.261 | 178 | 4.539 | 5.65E-06 | 3.56E-02 |
| rs12356318  | 10 | 86968645 | C | T | 0.26  | 179 | 4.599 | 4.25E-06 | 3.54E-02 |
| rs12356001  | 10 | 86968652 | G | A | 0.263 | 180 | 4.572 | 4.82E-06 | 4.07E-02 |
| rs12356002  | 10 | 86968663 | G | A | 0.263 | 180 | 4.572 | 4.82E-06 | 4.07E-02 |
| rs34204566  | 10 | 86968897 | C | T | 0.26  | 179 | 4.599 | 4.25E-06 | 3.54E-02 |
| rs61868038  | 10 | 86969069 | T | C | 0.26  | 179 | 4.599 | 4.25E-06 | 3.54E-02 |
| rs61868039  | 10 | 86969134 | C | T | 0.26  | 179 | 4.599 | 4.25E-06 | 3.54E-02 |
| rs11201480  | 10 | 86969555 | C | G | 0.261 | 179 | 4.599 | 4.25E-06 | 3.54E-02 |
| rs11201481  | 10 | 86969674 | T | A | 0.26  | 179 | 4.599 | 4.25E-06 | 3.54E-02 |
| rs11201482  | 10 | 86969788 | C | A | 0.261 | 179 | 4.599 | 4.25E-06 | 3.54E-02 |
| rs11201483  | 10 | 86970632 | G | A | 0.26  | 179 | 4.599 | 4.25E-06 | 3.54E-02 |
| rs11201484  | 10 | 86970701 | T | A | 0.26  | 178 | 4.582 | 4.61E-06 | 3.09E-02 |
| rs12781036  | 10 | 86971053 | C | T | 0.26  | 179 | 4.599 | 4.25E-06 | 3.54E-02 |
| rs12356962  | 10 | 86971306 | C | A | 0.26  | 179 | 4.599 | 4.25E-06 | 3.54E-02 |
| rs12355378  | 10 | 86971344 | T | C | 0.26  | 179 | 4.599 | 4.25E-06 | 3.54E-02 |
| rs61868040  | 10 | 86971381 | G | T | 0.331 | 210 | 4.739 | 2.15E-06 | 3.15E-02 |
| rs11201485  | 10 | 86972270 | G | A | 0.26  | 179 | 4.599 | 4.25E-06 | 3.54E-02 |
| rs12774986  | 10 | 86972939 | C | G | 0.26  | 179 | 4.599 | 4.25E-06 | 3.54E-02 |
| rs7901089   | 10 | 86973061 | G | A | 0.331 | 210 | 4.739 | 2.15E-06 | 3.15E-02 |
| rs12783552  | 10 | 86973422 | C | T | 0.26  | 179 | 4.599 | 4.25E-06 | 3.54E-02 |
| rs7908060   | 10 | 86973494 | C | T | 0.318 | 202 | 4.724 | 2.31E-06 | 2.89E-02 |
| rs7908084   | 10 | 86973539 | G | T | 0.324 | 205 | 4.959 | 7.09E-07 | 1.94E-02 |
| rs12783023  | 10 | 86973709 | A | C | 0.26  | 179 | 4.599 | 4.25E-06 | 3.54E-02 |
| rs12783994  | 10 | 86973858 | G | A | 0.26  | 179 | 4.599 | 4.25E-06 | 3.54E-02 |
| rs12764867  | 10 | 86973880 | C | T | 0.26  | 179 | 4.599 | 4.25E-06 | 3.54E-02 |
| rs11201486  | 10 | 86974335 | T | C | 0.26  | 179 | 4.599 | 4.25E-06 | 3.54E-02 |
| rs11201489  | 10 | 86975054 | A | G | 0.26  | 179 | 4.599 | 4.25E-06 | 3.54E-02 |
| rs11201490  | 10 | 86975061 | T | C | 0.26  | 179 | 4.599 | 4.25E-06 | 3.54E-02 |
| rs7474554   | 10 | 86975367 | A | G | 0.263 | 180 | 4.572 | 4.82E-06 | 4.07E-02 |
| rs11511545  | 10 | 86976098 | A | G | 0.26  | 179 | 4.599 | 4.25E-06 | 3.54E-02 |
| rs10887462  | 10 | 86976198 | A | T | 0.331 | 209 | 4.822 | 1.42E-06 | 2.99E-02 |
| rs11517193  | 10 | 86978079 | G | A | 0.26  | 179 | 4.599 | 4.25E-06 | 3.54E-02 |
| rs11201494  | 10 | 86980055 | G | A | 0.26  | 179 | 4.599 | 4.25E-06 | 3.54E-02 |
| rs11201496  | 10 | 86981163 | A | G | 0.26  | 179 | 4.599 | 4.25E-06 | 3.54E-02 |
| rs111192240 | 10 | 86982278 | A | C | 0.312 | 198 | 4.547 | 5.45E-06 | 2.74E-02 |

Online supplements are not copyedited prior to posting and the author(s) take full responsibility for the accuracy of all data.





|             |    |           |   |   |       |     |        |          |          |
|-------------|----|-----------|---|---|-------|-----|--------|----------|----------|
| rs11201499  | 10 | 86982364  | T | C | 0.312 | 198 | 4.547  | 5.45E-06 | 2.74E-02 |
| rs11201500  | 10 | 86982458  | T | C | 0.312 | 198 | 4.547  | 5.45E-06 | 2.74E-02 |
| rs11201502  | 10 | 86982746  | T | C | 0.312 | 198 | 4.547  | 5.45E-06 | 2.74E-02 |
| rs11201503  | 10 | 86982831  | A | G | 0.315 | 199 | 4.547  | 5.44E-06 | 2.41E-02 |
| rs2067733   | 10 | 86983016  | C | A | 0.33  | 209 | 4.822  | 1.42E-06 | 3.17E-02 |
| rs2067732   | 10 | 86983112  | T | C | 0.26  | 179 | 4.599  | 4.25E-06 | 3.54E-02 |
| rs2067731   | 10 | 86983200  | A | G | 0.312 | 198 | 4.547  | 5.45E-06 | 2.74E-02 |
| rs4326730   | 10 | 86983585  | A | T | 0.312 | 198 | 4.547  | 5.45E-06 | 2.74E-02 |
| rs12357940  | 10 | 86983849  | G | A | 0.319 | 200 | 4.722  | 2.33E-06 | 6.99E-03 |
| rs11201504  | 10 | 86984037  | G | A | 0.36  | 215 | 4.483  | 7.36E-06 | 2.79E-02 |
| rs12258780  | 10 | 86984107  | C | T | 0.367 | 216 | 4.431  | 9.40E-06 | 4.20E-02 |
| rs12766108  | 10 | 86984146  | A | G | 0.264 | 179 | 4.586  | 4.53E-06 | 8.13E-03 |
| rs11201506  | 10 | 86984840  | G | A | 0.233 | 172 | 4.567  | 4.95E-06 | 7.27E-03 |
| rs11201507  | 10 | 86984850  | C | T | 0.267 | 181 | 4.626  | 3.73E-06 | 1.80E-02 |
| rs4751781   | 10 | 122104137 | T | C | 0.393 | 233 | 4.426  | 9.59E-06 | 4.89E-02 |
| rs2420699   | 10 | 122105511 | A | G | 0.39  | 232 | 4.545  | 5.50E-06 | 3.34E-02 |
| rs7085764   | 10 | 122110415 | G | C | 0.399 | 232 | 4.427  | 9.53E-06 | 3.33E-02 |
| rs6585614   | 10 | 122110656 | C | T | 0.398 | 234 | 4.544  | 5.51E-06 | 3.76E-02 |
| rs2901228   | 10 | 122115383 | C | T | 0.394 | 234 | 4.536  | 5.72E-06 | 5.72E-02 |
| rs12799339  | 11 | 134683177 | C | T | 0.11  | 102 | 4.687  | 2.78E-06 | 3.98E-02 |
| rs12804167  | 11 | 134683957 | T | C | 0.115 | 103 | 4.566  | 4.96E-06 | 6.64E-02 |
| rs34965705  | 11 | 134683990 | C | T | 0.116 | 103 | 4.86   | 1.17E-06 | 2.99E-02 |
| rs12804688  | 11 | 134684090 | A | G | 0.116 | 103 | 4.86   | 1.17E-06 | 2.99E-02 |
| rs12786926  | 11 | 134684259 | C | T | 0.119 | 104 | 4.795  | 1.63E-06 | 3.23E-02 |
| rs12785284  | 11 | 134684267 | C | A | 0.116 | 103 | 4.86   | 1.17E-06 | 2.99E-02 |
| rs11819898  | 11 | 134684869 | T | C | 0.116 | 103 | 4.86   | 1.17E-06 | 2.99E-02 |
| rs12786906  | 11 | 134684914 | A | C | 0.11  | 102 | 4.687  | 2.78E-06 | 3.98E-02 |
| rs9576221   | 13 | 37789779  | C | T | 0.368 | 215 | -4.591 | 4.41E-06 | 2.61E-02 |
| rs9576222   | 13 | 37789910  | C | T | 0.366 | 214 | -4.556 | 5.21E-06 | 2.75E-02 |
| rs9566196   | 13 | 37789957  | A | G | 0.368 | 215 | -4.591 | 4.41E-06 | 2.61E-02 |
| rs10507446  | 13 | 37790007  | A | G | 0.366 | 214 | -4.556 | 5.21E-06 | 2.75E-02 |
| rs12585471  | 13 | 37791778  | T | G | 0.368 | 215 | -4.591 | 4.41E-06 | 2.61E-02 |
| rs12585465  | 13 | 37791815  | T | C | 0.368 | 215 | -4.591 | 4.41E-06 | 2.61E-02 |
| rs12583869  | 13 | 37791872  | G | A | 0.366 | 213 | -4.527 | 5.98E-06 | 2.79E-02 |
| rs76262092  | 13 | 37795449  | G | A | 0.366 | 214 | -4.556 | 5.21E-06 | 2.75E-02 |
| rs2181793   | 13 | 37797955  | C | A | 0.368 | 215 | -4.591 | 4.41E-06 | 2.61E-02 |
| rs9576223   | 13 | 37803027  | G | A | 0.368 | 215 | -4.591 | 4.41E-06 | 2.61E-02 |
| rs1324032   | 13 | 37807141  | C | A | 0.368 | 215 | -4.591 | 4.41E-06 | 2.61E-02 |
| rs1324033   | 13 | 37807152  | C | T | 0.373 | 218 | -4.515 | 6.32E-06 | 2.78E-02 |
| rs17055165  | 13 | 37810722  | T | G | 0.367 | 215 | -4.66  | 3.16E-06 | 2.32E-02 |
| rs2057533   | 13 | 37811007  | T | A | 0.366 | 213 | -4.573 | 4.80E-06 | 2.72E-02 |
| rs17055167  | 13 | 37812291  | T | C | 0.368 | 215 | -4.591 | 4.41E-06 | 2.61E-02 |
| rs9576227   | 13 | 37816214  | C | T | 0.367 | 215 | -4.619 | 3.86E-06 | 2.92E-02 |
| rs9566199   | 13 | 37818192  | T | A | 0.371 | 215 | -4.555 | 5.24E-06 | 2.99E-02 |
| rs150838167 | 17 | 13157439  | C | T | 0.098 | 98  | 4.46   | 8.19E-06 | 1.48E-01 |
| rs3899359   | 17 | 13179734  | G | A | 0.088 | 88  | 4.66   | 3.17E-06 | 1.98E-01 |
| rs174823    | 21 | 24489048  | C | G | 0.288 | 184 | -4.472 | 7.76E-06 | 2.16E-02 |

\*Adjusted for gender, age and height. MAF: Minor Allele Frequency, NINFF: Number of informative families

**e-Table 4.** The table shows all SNPs with association p-value below  $10^{-5}$  for PB FEV1 (unadjusted) and the corresponding p-values for the adjusted trait.

| rs ID           | Chr | Basepair  | A1 | A2 | MAF   | NINFF | Z-score | unadjusted model p-value | adjusted model p-value |
|-----------------|-----|-----------|----|----|-------|-------|---------|--------------------------|------------------------|
| rs5779191       | 1   | 183818218 | T  | A  | 0.256 | 175   | 4.61    | 4.04E-06                 | 5.21E-01               |
| rs1978647       | 2   | 43371360  | C  | G  | 0.078 | 77    | -4.469  | 7.87E-06                 | 9.67E-02               |
| rs6788345       | 3   | 130328243 | T  | G  | 0.502 | 205   | -4.428  | 9.50E-06                 | 1.42E-01               |
| rs6439251       | 3   | 130333768 | G  | A  | 0.458 | 213   | 4.678   | 2.90E-06                 | 7.62E-02               |
| rs13322828      | 3   | 130336776 | A  | T  | 0.467 | 209   | 4.433   | 9.31E-06                 | 6.91E-02               |
| rs59630925      | 3   | 130337197 | T  | A  | 0.467 | 209   | 4.433   | 9.31E-06                 | 6.91E-02               |
| rs7651359       | 3   | 130339246 | A  | T  | 0.48  | 209   | 4.473   | 7.71E-06                 | 9.64E-02               |
| rs9849240       | 3   | 130354824 | C  | T  | 0.473 | 207   | 4.53    | 5.89E-06                 | 7.76E-02               |
| rs28623596      | 3   | 130356163 | G  | T  | 0.473 | 207   | 4.53    | 5.89E-06                 | 7.76E-02               |
| rs111196893     | 3   | 130356238 | A  | T  | 0.473 | 207   | 4.701   | 2.60E-06                 | 7.59E-02               |
| rs56857660      | 3   | 130357080 | C  | T  | 0.473 | 208   | 4.515   | 6.35E-06                 | 8.08E-02               |
| rs58456232      | 3   | 130357248 | C  | A  | 0.473 | 208   | 4.515   | 6.35E-06                 | 8.08E-02               |
| rs1484937       | 3   | 130357328 | C  | T  | 0.473 | 208   | 4.515   | 6.35E-06                 | 8.08E-02               |
| rs1484938       | 3   | 130357428 | T  | C  | 0.473 | 208   | 4.515   | 6.35E-06                 | 8.08E-02               |
| rs57114953      | 3   | 130357543 | C  | A  | 0.473 | 208   | 4.515   | 6.35E-06                 | 8.08E-02               |
| 3:130357547:T:G | 3   | 130357547 | T  | G  | 0.473 | 208   | 4.515   | 6.35E-06                 | 8.08E-02               |
| rs9858810       | 3   | 130358109 | G  | A  | 0.473 | 208   | 4.515   | 6.35E-06                 | 8.08E-02               |
| rs9821794       | 3   | 130358313 | A  | G  | 0.473 | 208   | 4.515   | 6.35E-06                 | 8.08E-02               |
| rs9821658       | 3   | 130358358 | A  | C  | 0.473 | 208   | 4.515   | 6.35E-06                 | 8.08E-02               |
| rs9821660       | 3   | 130358365 | G  | C  | 0.473 | 208   | 4.515   | 6.35E-06                 | 8.08E-02               |
| rs6791113       | 3   | 130358495 | C  | T  | 0.474 | 208   | 4.442   | 8.91E-06                 | 9.49E-02               |
| rs6778250       | 3   | 130358602 | A  | G  | 0.473 | 208   | 4.515   | 6.35E-06                 | 8.08E-02               |
| rs62418430      | 6   | 92355806  | A  | G  | 0.146 | 122   | -4.414  | 1.00E-05                 | 2.17E-02               |
| rs7740935       | 6   | 163559154 | A  | T  | 0.143 | 125   | -4.473  | 7.70E-06                 | 7.15E-02               |
| rs6924563       | 6   | 163560038 | T  | C  | 0.137 | 123   | -4.55   | 5.36E-06                 | 5.92E-02               |
| rs10081348      | 7   | 156375728 | T  | C  | 0.049 | 56    | 4.408   | 1.00E-05                 | 4.84E-01               |
| rs10278648      | 7   | 156382240 | T  | C  | 0.1   | 112   | 4.468   | 7.89E-06                 | 3.20E-01               |
| rs13312612      | 7   | 156383684 | A  | G  | 0.1   | 112   | 4.468   | 7.89E-06                 | 3.20E-01               |
| rs1544525       | 7   | 156395110 | C  | G  | 0.1   | 112   | 4.468   | 7.89E-06                 | 3.20E-01               |
| rs62517707      | 8   | 131408202 | A  | G  | 0.238 | 176   | 4.82    | 1.43E-06                 | 1.84E-02               |
| rs72761264      | 9   | 133072737 | A  | G  | 0.132 | 107   | -4.486  | 7.25E-06                 | 9.40E-03               |
| rs11593943      | 10  | 33545081  | T  | C  | 0.255 | 180   | 4.54    | 5.64E-06                 | 8.99E-01               |
| rs7901385       | 10  | 43337057  | G  | A  | 0.47  | 229   | 4.462   | 8.11E-06                 | 4.12E-02               |
| rs11201438      | 10  | 86942568  | A  | G  | 0.257 | 176   | 4.484   | 7.34E-06                 | 5.55E-02               |
| rs1339907       | 10  | 86950656  | T  | C  | 0.262 | 178   | 4.609   | 4.06E-06                 | 2.37E-02               |
| rs1339908       | 10  | 86950658  | T  | C  | 0.262 | 178   | 4.609   | 4.06E-06                 | 2.37E-02               |
| rs11201447      | 10  | 86955624  | T  | C  | 0.295 | 193   | 4.478   | 7.53E-06                 | 6.58E-02               |
| rs2050795       | 10  | 86957751  | C  | T  | 0.295 | 193   | 4.478   | 7.53E-06                 | 6.58E-02               |
| rs1339914       | 10  | 86960054  | A  | T  | 0.268 | 184   | 4.422   | 9.76E-06                 | 1.19E-01               |
| rs1339915       | 10  | 86960078  | T  | C  | 0.268 | 184   | 4.422   | 9.76E-06                 | 1.19E-01               |
| rs12766774      | 10  | 86960524  | G  | A  | 0.268 | 184   | 4.422   | 9.76E-06                 | 1.19E-01               |
| rs12766218      | 10  | 86960634  | T  | C  | 0.268 | 184   | 4.422   | 9.76E-06                 | 1.19E-01               |
| rs11201452      | 10  | 86961299  | A  | T  | 0.268 | 184   | 4.422   | 9.76E-06                 | 1.19E-01               |
| rs12768920      | 10  | 86962827  | G  | A  | 0.268 | 184   | 4.422   | 9.76E-06                 | 1.19E-01               |
| rs11201453      | 10  | 86963611  | C  | T  | 0.268 | 184   | 4.422   | 9.76E-06                 | 1.19E-01               |
| rs1416924       | 10  | 86964119  | C  | T  | 0.268 | 184   | 4.422   | 9.76E-06                 | 1.19E-01               |



|            |    |          |   |   |       |     |       |          |          |
|------------|----|----------|---|---|-------|-----|-------|----------|----------|
| rs12777141 | 10 | 86964444 | G | A | 0.268 | 184 | 4.422 | 9.76E-06 | 1.19E-01 |
| rs11201454 | 10 | 86964566 | C | A | 0.268 | 184 | 4.422 | 9.76E-06 | 1.19E-01 |
| rs11201455 | 10 | 86964789 | T | C | 0.268 | 184 | 4.422 | 9.76E-06 | 1.19E-01 |
| rs1416925  | 10 | 86964927 | C | T | 0.268 | 184 | 4.422 | 9.76E-06 | 1.19E-01 |
| rs1416926  | 10 | 86965064 | A | T | 0.268 | 184 | 4.422 | 9.76E-06 | 1.19E-01 |
| rs1416927  | 10 | 86965204 | G | A | 0.268 | 184 | 4.422 | 9.76E-06 | 1.19E-01 |
| rs1416929  | 10 | 86965265 | A | G | 0.268 | 184 | 4.422 | 9.76E-06 | 1.19E-01 |
| rs11201456 | 10 | 86965535 | G | A | 0.268 | 184 | 4.422 | 9.76E-06 | 1.19E-01 |
| rs11201457 | 10 | 86965572 | G | C | 0.268 | 184 | 4.422 | 9.76E-06 | 1.19E-01 |
| rs11201459 | 10 | 86966069 | C | T | 0.26  | 178 | 4.437 | 9.12E-06 | 6.52E-02 |
| rs11201461 | 10 | 86966202 | G | A | 0.26  | 178 | 4.437 | 9.12E-06 | 6.52E-02 |
| rs11201462 | 10 | 86966316 | C | A | 0.26  | 178 | 4.437 | 9.12E-06 | 6.52E-02 |
| rs11201463 | 10 | 86966361 | G | T | 0.26  | 178 | 4.437 | 9.12E-06 | 6.52E-02 |
| rs11201464 | 10 | 86966369 | A | G | 0.26  | 178 | 4.437 | 9.12E-06 | 6.52E-02 |
| rs11201465 | 10 | 86966491 | C | T | 0.26  | 178 | 4.437 | 9.12E-06 | 6.52E-02 |
| rs11201466 | 10 | 86966577 | T | A | 0.26  | 178 | 4.437 | 9.12E-06 | 6.52E-02 |
| rs11201467 | 10 | 86966590 | G | A | 0.26  | 178 | 4.437 | 9.12E-06 | 6.52E-02 |
| rs11201468 | 10 | 86966732 | T | C | 0.26  | 178 | 4.437 | 9.12E-06 | 6.52E-02 |
| rs11201469 | 10 | 86966777 | T | C | 0.263 | 179 | 4.501 | 6.75E-06 | 7.33E-02 |
| rs11201470 | 10 | 86966910 | C | T | 0.26  | 178 | 4.437 | 9.12E-06 | 6.52E-02 |
| rs11201472 | 10 | 86967515 | G | A | 0.263 | 179 | 4.48  | 7.47E-06 | 7.56E-02 |
| rs11201474 | 10 | 86967642 | C | T | 0.26  | 178 | 4.437 | 9.12E-06 | 6.52E-02 |
| rs11201475 | 10 | 86967680 | T | G | 0.26  | 178 | 4.437 | 9.12E-06 | 6.52E-02 |
| rs11201477 | 10 | 86968052 | G | T | 0.26  | 178 | 4.437 | 9.12E-06 | 6.52E-02 |
| rs11201478 | 10 | 86968139 | A | T | 0.26  | 178 | 4.437 | 9.12E-06 | 6.52E-02 |
| rs11201479 | 10 | 86968244 | T | A | 0.26  | 178 | 4.437 | 9.12E-06 | 6.52E-02 |
| rs12356318 | 10 | 86968645 | C | T | 0.26  | 178 | 4.437 | 9.12E-06 | 6.52E-02 |
| rs12356001 | 10 | 86968652 | G | A | 0.263 | 179 | 4.501 | 6.75E-06 | 7.33E-02 |
| rs12356002 | 10 | 86968663 | G | A | 0.263 | 179 | 4.501 | 6.75E-06 | 7.33E-02 |
| rs34204566 | 10 | 86968897 | C | T | 0.26  | 178 | 4.437 | 9.12E-06 | 6.52E-02 |
| rs61868038 | 10 | 86969069 | T | C | 0.26  | 178 | 4.437 | 9.12E-06 | 6.52E-02 |
| rs61868039 | 10 | 86969134 | C | T | 0.26  | 178 | 4.437 | 9.12E-06 | 6.52E-02 |
| rs11201480 | 10 | 86969555 | C | G | 0.261 | 178 | 4.437 | 9.12E-06 | 6.52E-02 |
| rs11201481 | 10 | 86969674 | T | A | 0.26  | 178 | 4.437 | 9.12E-06 | 6.52E-02 |
| rs11201482 | 10 | 86969788 | C | A | 0.261 | 178 | 4.437 | 9.12E-06 | 6.52E-02 |
| rs11201483 | 10 | 86970632 | G | A | 0.26  | 178 | 4.437 | 9.12E-06 | 6.52E-02 |
| rs11201484 | 10 | 86970701 | T | A | 0.26  | 177 | 4.427 | 9.53E-06 | 5.45E-02 |
| rs12781036 | 10 | 86971053 | C | T | 0.26  | 178 | 4.437 | 9.12E-06 | 6.52E-02 |
| rs12356962 | 10 | 86971306 | C | A | 0.26  | 178 | 4.437 | 9.12E-06 | 6.52E-02 |
| rs12355378 | 10 | 86971344 | T | C | 0.26  | 178 | 4.437 | 9.12E-06 | 6.52E-02 |
| rs61868040 | 10 | 86971381 | G | T | 0.331 | 209 | 4.581 | 4.63E-06 | 4.03E-02 |
| rs11201485 | 10 | 86972270 | G | A | 0.26  | 178 | 4.437 | 9.12E-06 | 6.52E-02 |
| rs12774986 | 10 | 86972939 | C | G | 0.26  | 178 | 4.437 | 9.12E-06 | 6.52E-02 |
| rs7901089  | 10 | 86973061 | G | A | 0.331 | 209 | 4.581 | 4.63E-06 | 4.03E-02 |
| rs12783552 | 10 | 86973422 | C | T | 0.26  | 178 | 4.437 | 9.12E-06 | 6.52E-02 |
| rs7908060  | 10 | 86973494 | C | T | 0.318 | 201 | 4.528 | 5.97E-06 | 3.46E-02 |
| rs7908084  | 10 | 86973539 | G | T | 0.324 | 204 | 4.758 | 1.95E-06 | 2.18E-02 |
| rs12783023 | 10 | 86973709 | A | C | 0.26  | 178 | 4.437 | 9.12E-06 | 6.52E-02 |
| rs12783994 | 10 | 86973858 | G | A | 0.26  | 178 | 4.437 | 9.12E-06 | 6.52E-02 |
| rs12764867 | 10 | 86973880 | C | T | 0.26  | 178 | 4.437 | 9.12E-06 | 6.52E-02 |
| rs11201486 | 10 | 86974335 | T | C | 0.26  | 178 | 4.437 | 9.12E-06 | 6.52E-02 |
| rs11201489 | 10 | 86975054 | A | G | 0.26  | 178 | 4.437 | 9.12E-06 | 6.52E-02 |

Online supplements are not copyedited prior to posting and the author(s) take full responsibility for the accuracy of all data.

|             |    |           |   |   |       |     |        |          |          |
|-------------|----|-----------|---|---|-------|-----|--------|----------|----------|
| rs11201490  | 10 | 86975061  | T | C | 0.26  | 178 | 4.437  | 9.12E-06 | 6.52E-02 |
| rs7474554   | 10 | 86975367  | A | G | 0.263 | 179 | 4.501  | 6.75E-06 | 7.33E-02 |
| rs11511545  | 10 | 86976098  | A | G | 0.26  | 178 | 4.437  | 9.12E-06 | 6.52E-02 |
| rs10887462  | 10 | 86976198  | A | T | 0.331 | 208 | 4.649  | 3.34E-06 | 4.06E-02 |
| rs11517193  | 10 | 86978079  | G | A | 0.26  | 178 | 4.437  | 9.12E-06 | 6.52E-02 |
| rs11201494  | 10 | 86980055  | G | A | 0.26  | 178 | 4.437  | 9.12E-06 | 6.52E-02 |
| rs11201496  | 10 | 86981163  | A | G | 0.26  | 178 | 4.437  | 9.12E-06 | 6.52E-02 |
| rs2067733   | 10 | 86983016  | C | A | 0.33  | 208 | 4.676  | 2.93E-06 | 3.88E-02 |
| rs2067732   | 10 | 86983112  | T | C | 0.26  | 178 | 4.437  | 9.12E-06 | 6.52E-02 |
| rs12357940  | 10 | 86983849  | G | A | 0.319 | 199 | 4.423  | 9.75E-06 | 8.28E-03 |
| rs11201504  | 10 | 86984037  | G | A | 0.36  | 214 | 4.441  | 8.97E-06 | 2.10E-02 |
| rs11201507  | 10 | 86984850  | C | T | 0.267 | 180 | 4.41   | 1.00E-05 | 4.30E-02 |
| rs2420699   | 10 | 122105511 | A | G | 0.39  | 231 | 4.428  | 9.53E-06 | 2.53E-02 |
| rs2901228   | 10 | 122115383 | C | T | 0.394 | 233 | 4.446  | 8.75E-06 | 3.89E-02 |
| rs34965705  | 11 | 134683990 | C | T | 0.116 | 102 | 4.546  | 5.47E-06 | 1.72E-02 |
| rs12804688  | 11 | 134684090 | A | G | 0.116 | 102 | 4.546  | 5.47E-06 | 1.72E-02 |
| rs12786926  | 11 | 134684259 | C | T | 0.119 | 103 | 4.481  | 7.45E-06 | 1.90E-02 |
| rs12785284  | 11 | 134684267 | C | A | 0.116 | 102 | 4.546  | 5.47E-06 | 1.72E-02 |
| rs11819898  | 11 | 134684869 | T | C | 0.116 | 102 | 4.546  | 5.47E-06 | 1.72E-02 |
| rs10860615  | 12 | 101023679 | G | A | 0.386 | 211 | -4.427 | 9.55E-06 | 2.73E-01 |
| rs522097    | 13 | 26748748  | A | G | 0.199 | 160 | 4.525  | 6.04E-06 | 2.25E-01 |
| rs9576218   | 13 | 37785892  | T | C | 0.41  | 222 | -4.426 | 9.62E-06 | 1.26E-02 |
| rs9576221   | 13 | 37789779  | C | T | 0.368 | 214 | -5.054 | 4.33E-07 | 4.46E-03 |
| rs9576222   | 13 | 37789910  | C | T | 0.366 | 213 | -5.022 | 5.11E-07 | 4.61E-03 |
| rs9566196   | 13 | 37789957  | A | G | 0.368 | 214 | -5.054 | 4.33E-07 | 4.46E-03 |
| rs10507446  | 13 | 37790007  | A | G | 0.366 | 213 | -5.022 | 5.11E-07 | 4.61E-03 |
| rs12585471  | 13 | 37791778  | T | G | 0.368 | 214 | -5.054 | 4.33E-07 | 4.46E-03 |
| rs12585465  | 13 | 37791815  | T | C | 0.368 | 214 | -5.054 | 4.33E-07 | 4.46E-03 |
| rs12583869  | 13 | 37791872  | G | A | 0.366 | 212 | -4.986 | 6.17E-07 | 4.93E-03 |
| rs76262092  | 13 | 37795449  | G | A | 0.366 | 213 | -5.022 | 5.11E-07 | 4.61E-03 |
| rs2181793   | 13 | 37797955  | C | A | 0.368 | 214 | -5.054 | 4.33E-07 | 4.46E-03 |
| rs9576223   | 13 | 37803027  | G | A | 0.368 | 214 | -5.054 | 4.33E-07 | 4.46E-03 |
| rs1324032   | 13 | 37807141  | C | A | 0.368 | 214 | -5.054 | 4.33E-07 | 4.46E-03 |
| rs1324033   | 13 | 37807152  | C | T | 0.373 | 217 | -4.993 | 5.95E-07 | 4.54E-03 |
| rs17055165  | 13 | 37810722  | T | G | 0.367 | 214 | -5.122 | 3.03E-07 | 3.92E-03 |
| rs2057533   | 13 | 37811007  | T | A | 0.366 | 212 | -5.04  | 4.67E-07 | 4.54E-03 |
| rs17055167  | 13 | 37812291  | T | C | 0.368 | 214 | -5.054 | 4.33E-07 | 4.46E-03 |
| rs9576227   | 13 | 37816214  | C | T | 0.367 | 214 | -5.085 | 3.69E-07 | 4.95E-03 |
| rs9566199   | 13 | 37818192  | T | A | 0.371 | 214 | -5.029 | 4.93E-07 | 4.87E-03 |
| rs9576228   | 13 | 37819029  | G | A | 0.337 | 206 | -4.761 | 1.93E-06 | 1.16E-02 |
| rs4143038   | 13 | 37820805  | A | G | 0.335 | 204 | -4.785 | 1.71E-06 | 1.27E-02 |
| rs9576231   | 13 | 37834559  | G | A | 0.335 | 204 | -4.785 | 1.71E-06 | 1.27E-02 |
| rs150838167 | 17 | 13157439  | C | T | 0.098 | 97  | 4.571  | 4.86E-06 | 1.27E-01 |
| rs3899359   | 17 | 13179734  | G | A | 0.088 | 87  | 4.764  | 1.89E-06 | 2.02E-01 |

\*Adjusted for gender, age and height. MAF: Minor Allele Frequency, NINFF: Number of informative families

## REFERENCES

1. Chatham M, Bleecker ER, Smith PL, Rosenthal RR, Mason P, Norman PS. A comparison of histamine, methacholine, and exercise airway reactivity in normal and asthmatic subjects. *Am Rev Respir Dis.* 1982;126:235–40.
2. Standardization of Spirometry, 1994 Update. American Thoracic Society. *Am J Respir Crit Care Med.* 1995;152:1107–36.
3. Hankinson JL, Odencrantz JR, Fedan KB. Spirometric reference values from a sample of the general U.S. population. *Am J Respir Crit Care Med.* 1999;159:179–87.
4. The Childhood Asthma Management Program (CAMP): design, rationale, and methods. Childhood Asthma Management Program Research Group. *Control Clin Trials.* 1999;20:91–120.
5. Brehm JM, Acosta-Perez E, Klei L, Roeder K, Barmada MM, Boutaoui N, et al. African ancestry and lung function in Puerto Rican children. *J Allergy Clin Immunol.* 2012;129:1484–90.e6.
6. Nishimura KK, Galanter JM, Roth LA, Oh SS, Thakur N, Nguyen EA, et al. Early-life air pollution and asthma risk in minority children. The GALA II and SAGE II studies. *Am J Respir Crit Care Med.* 2013;188:309–18.
7. Wells KE, Cajigal S, Peterson EL, Ahmedani BK, Kumar R, Lanfear DE, et al. Assessing differences in inhaled corticosteroid response by self-reported race-ethnicity and genetic ancestry among asthmatic subjects. *J Allergy Clin Immunol.* 2016;137:1364–1369.e2.
8. Bisgaard H. The Copenhagen Prospective Study on Asthma in Childhood (COPSAC): design, rationale, and baseline data from a longitudinal birth cohort study. *Ann Allergy Asthma Immunol.* 2004;93:381–9.
9. Bisgaard H, Jensen SM, Bonnelykke K. Interaction between asthma and lung function growth in early life. *Am J Respir Crit Care Med.* 2012;185:1183–9.
10. Forno E, Wang T, Yan Q, Brehm J, Acosta-Perez E, Colon-Semidey A, et al. A Multiomics Approach to Identify Genes Associated with Childhood Asthma Risk and Morbidity. *Am J Respir Cell Mol Biol.* 2017;57:439–47.
11. Forno E, Sordillo J, Brehm J, Chen W, Benos T, Yan Q, et al. Genome-wide interaction study of dust mite allergen on lung function in children with asthma. *J Allergy Clin Immunol.* 2017;140:996–1003.e7.
12. Miller MR, Hankinson J, Brusasco V, Burgos F, Casaburi R, Coates A, et al. Standardisation of spirometry. *Eur Respir J.* 2005;26:319–38.
13. Manichaikul A, Mychaleckyj JC, Rich SS, Daly K, Sale M, Chen W-M. Robust relationship inference in genome-wide association studies. *Bioinformatics.* 2010;26:2867–73.
